# Supplementary material for: DNA Intercalators Inhibit Eukaryotic Ribosomal RNA Synthesis by Impairing the Initiation of Transcription
Source: MDPI journal article supplement (doi:10.3390/genes12091412), 2021-09-14
Supplement: s1 [file s1]

## Supplementary data

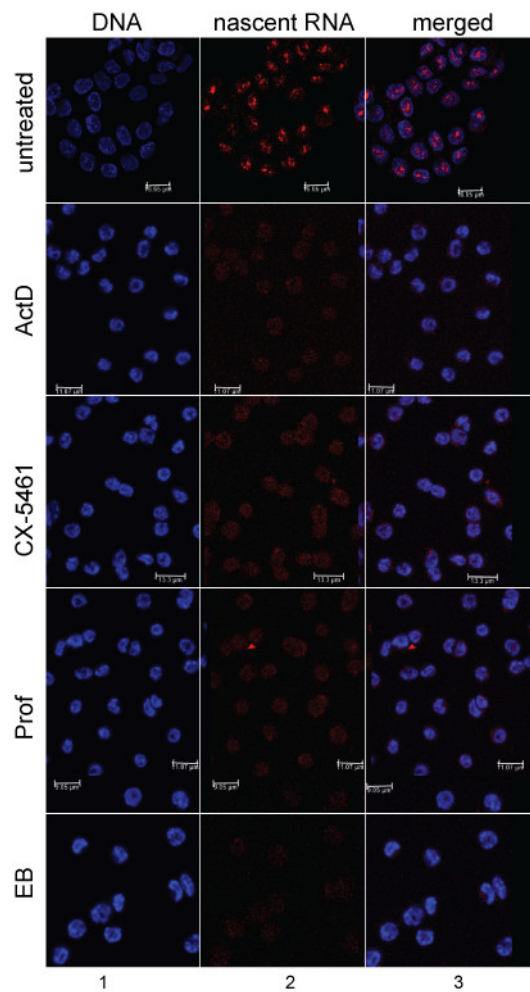

**Figure S1. Long treatment with intercalators affects all transcription activity in cells.** HCT116 p53<sup>-/-</sup> cells were treated with drug for 4 hours or left untreated as indicated. Following concentrations were used: Actinomycin D (ActD): 3  $\mu$ M; ethidium bromide (EB): 40  $\mu$ M; Proflavine (Pro): 2  $\mu$ M; CX5461: 5  $\mu$ M 1 mM 5EU was added to cells and incubation was continued for another hour. Cells were fixed and then permeabilized. Nascent RNA (red, middle panel) was detected using Click-IT® Cell Reaction Buffer Kit (ThermoFisher) supplemented with Cy5 Azide (Sigma). Nucleolar DNA (blue, left panel) was stained with Hoechst 33342. Merged images are shown (right panel). Images were acquired with a Leica TCS SP5 confocal microscope equipped with an x63 oil-filled objective.

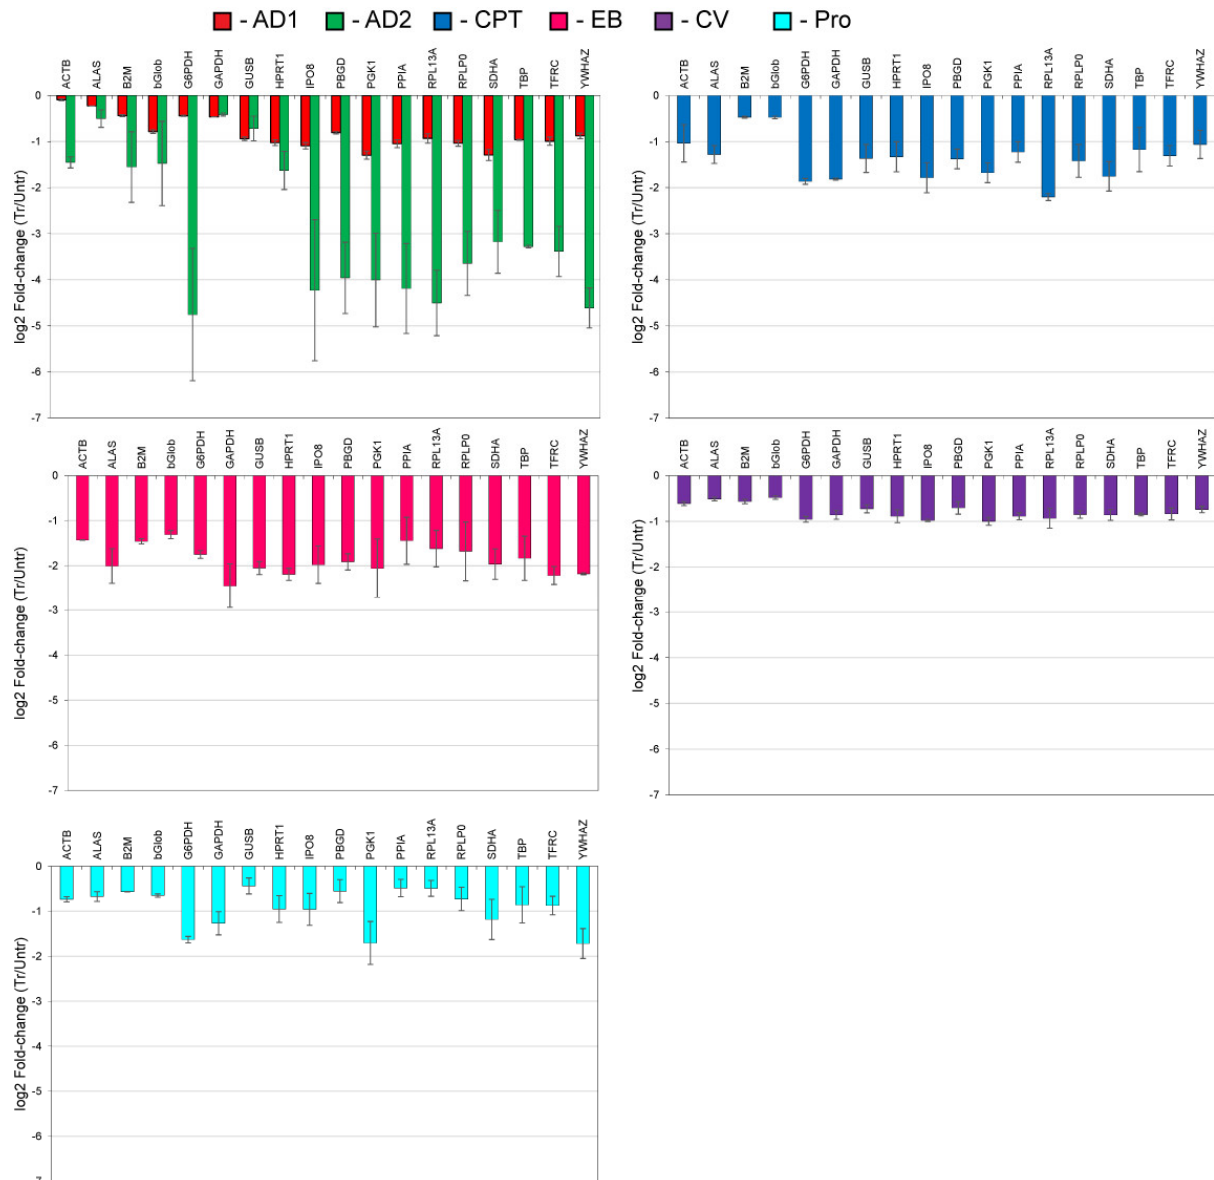

**Figure S2. Intercalators have moderate negative effect on Pol-II transcription in the presence of wt p53.** HCT116 p53<sup>+/+</sup> cells grown to 70% confluence and were incubated with the drugs as indicated for 30 minutes prior to lysis (AD1 – 3 nM Actinomycin D; AD2 – 3  $\mu$ M Actinomycin D; CPT – 8  $\mu$ M Camptothecin; EB – 40  $\mu$ M ethidium bromide; CV – 20  $\mu$ M crystal violet; Pro - 2  $\mu$ M Proflavine; CX5461 - 5  $\mu$ M CX-5461). Total RNA was isolated, reverse transcribed and analysed by qPCR. The levels of mRNA of 18 genes (as indicated) were analysed in treated and untreated cells using the Human Housekeeper reference gene plate (Roche). The signals were normalised to 18S rRNA and plotted as log<sub>2</sub> of treated/untreated ratio. The data represents an average from three independent experiments (n=3); standard deviations are shown.

**Supplementary Table S1. Antibody used in this work**

| Antibody          | Origin | Company    | Cat.number | WB     | ChIP/IP |
|-------------------|--------|------------|------------|--------|---------|
| RPA135 (N-17)     | Goat   | Santa Cruz | Sc-17913   |        | 12.5µg  |
| TAF <sub>63</sub> | Rabbit | JZ lab     | N/A        |        | 10 µl   |
| UBF (H300)        | Rabbit | Santa Cruz | Sc-9131    |        | 12.5µg  |
| Topo I (H-300)    | Rabbit | Santa Cruz | Sc-10783   | 1:1000 |         |
| Rabbit IgG        | Rabbit | Sigma      | I5006      |        | 12.5µg  |
| Sheep IgG         | Sheep  | Sigma      | I5131      |        | 12.5µg  |

**Supplementary Table S2. Sequences of all primers and probes used in this work**

| Template             | Primer/oligo      | Sequence 5'-3'           | Modification        | Amplicon/probe                                      |
|----------------------|-------------------|--------------------------|---------------------|-----------------------------------------------------|
| plasmid<br>pcfTAF110 | template_Pol_II_F | GAAAAATAAACAAATAGGGGTTCC | 5' biotin           | PCR product; 5'-<br>biotynilated<br>CMV_FR, 1354 bp |
|                      | template_Pol_II_R | TGCTCAGTCACATCCAGCAC     | -                   |                                                     |
| CMV_FR               | Pol_IITr_R        | CAGTCACATCCAGCAGACT      | -                   | PCR product 412 bp                                  |
|                      | Pol_IITr_F        | GGAGACCCAAGCTGGCTAGT     | -                   |                                                     |
|                      | Pol_IITr2_F       | CCCCTTCACCATGGATTACA     | -                   | PCR product 127 bp                                  |
|                      | Pol_IITr2_R       | CCAGCTGCACATGAAAGAGA     | -                   |                                                     |
|                      | Pol-II_Pr         | ACGACGATAAGGACTTCCCC     | 5'-HEX, 3'-<br>BHQ2 | qPCR dual labelled<br>probe                         |

**Reference genes panel**

| Posi<br>tion | Transcript<br>Identifier | Ass<br>ay<br>ID | Forward Sequenz       | For<br>war<br>d<br>Seq<br>uen<br>z | Reverse Sequenz        | Rev<br>erse<br>Seq<br>uen<br>z | Kont<br>rolle | Refe<br>renz<br>Gen | Design Info.                     |
|--------------|--------------------------|-----------------|-----------------------|------------------------------------|------------------------|--------------------------------|---------------|---------------------|----------------------------------|
| A1           | NR_003286                | 104092          | GACGGACCAGAGCGAAAG    | 18                                 | CGTCTTCGAACCTCCGACT    | 19                             | 0             | 1                   | NR_003286//EntrezGene//RN18S1    |
| B1           | ENST00000349264          | 102065          | CCGTGTGAACCATGTGACTTT | 21                                 | CCTCCATGATGCTGCTTACA   | 20                             | 0             | 1                   | ENST00000349264//Ensembl//B2M    |
| C1           | ENST00000229239          | 143641          | TGGTATCGTGGAAGGACTCA  | 20                                 | GCAGGGATGATGTCTGGAG    | 20                             | 0             | 1                   | ENST00000229239//Ensembl//GAPDH  |
| D1           | ENST00000256079          | 102132          | GTGTACACACTGCGAGAGCAC | 21                                 | GCCTCCCTGTTGTTCAATCT   | 20                             | 0             | 1                   | ENST00000256079//Ensembl//IPO8   |
| E1           | ENST00000355968          | 102088          | TTCATCTGCACTGCCAAGAC  | 20                                 | CACTTTGCCAAACACCACAT   | 20                             | 0             | 1                   | ENST00000355968//Ensembl//PPIA   |
| F1           | ENST00000264932          | 145170          | TCCACTACATGACGGAGCAG  | 20                                 | CCATCTTCAGTTCTGCTAAACG | 22                             | 0             | 1                   | ENST00000264932//Ensembl//SDHA   |
| G1           | ENST00000353245          | 102125          | GATCCCAATGCTTCACAAG   | 20                                 | TGCTTGTTGTGAC TGATCGAC | 21                             | 0             | 1                   | ENST00000353245//Ensembl//YWHAZ  |
| H1           | ENST00000322644          | 102977          | TCCGTATTCGCATCATGAAC  | 20                                 | TCATCCATCTTGTC CACCAC  | 20                             | 1             | 0                   | ENST00000322644//Ensembl//POLR2A |
| A2           | ENST00000331789          | 101125          | GGCCAGGTCATCACCATT    | 18                                 | GGATGCCACAGGACTCCAT    | 19                             | 0             | 1                   | ENST00000331789//Ensembl//ACTB   |

|    |                     |            |                              |    |                              |    |   |   |                                      |
|----|---------------------|------------|------------------------------|----|------------------------------|----|---|---|--------------------------------------|
| B2 |                     | 102<br>141 | TGCAGGCTGCCTA<br>TCAGAA      | 19 | GCGAGCTTAGTGA<br>TACTTGTGG   | 22 | 0 | 1 | ENST00000335295//<br>Ensembl//HBB    |
| C2 | ENST000<br>00304895 | 102<br>074 | CGCCCTGCCTATC<br>TGTATTC     | 20 | TCCCCACAGGGAG<br>TGTGTAG     | 20 | 0 | 1 | ENST00000304895//<br>Ensembl//GUSB   |
| D2 | ENST000<br>00278715 | 102<br>110 | TGCCCTGGAGAA<br>GAATGAAG     | 20 | CAGCATCATGAGG<br>GTTTTC      | 20 | 0 | 1 | ENST00000278715//<br>Ensembl//HMBS   |
| E2 | ENST000<br>00391857 | 102<br>119 | CTGGACCGTCTCA<br>AGGTGTT     | 20 | GCCCCAGATAGGC<br>AAACTT      | 19 | 0 | 1 | ENST00000391857//<br>Ensembl//RPL13A |
| F2 | ENST000<br>00392092 | 101<br>145 | GAACATCATGGA<br>TCAGAACAAACA | 23 | ATAGGGATTCCGG<br>GAGTCAT     | 20 | 0 | 1 | ENST00000392092//<br>Ensembl//TBP    |
| G2 | ENST000<br>00322644 | 102<br>978 | CCTGAGTCCGGAT<br>GAACTG      | 19 | GCCTCCCTCAGTC<br>GTCTCT      | 19 | 1 | 0 | ENST00000322644//<br>Ensembl//POLR2A |
| H2 | ENST000<br>00360110 | 102<br>422 | TGGGTTTTTGTTA<br>CCTTTATGGTT | 24 | GGAGGTAACATGC<br>AAATAATGTGA | 24 | 1 | 0 | ENST00000360110//<br>Ensembl//TFRC   |
| A3 | ENST000<br>00394965 | 102<br>108 | GAAATGAATGCC<br>GTGAGGAA     | 20 | CCTCCATCGGTTTT<br>CACACT     | 20 | 0 | 1 | ENST00000394965//<br>Ensembl//ALAS1  |
| B3 | ENST000<br>00393564 | 102<br>098 | TCCATCAGTCGGA<br>TACACACA    | 21 | CACCAGATGGTGG<br>GGTAGAT     | 20 | 0 | 1 | ENST00000393564//<br>Ensembl//G6PD   |
| C3 | ENST000<br>00370796 | 102<br>079 | TGACCTTGATTTA<br>TTTTGCATACC | 24 | CGAGCAAGACGTT<br>CAGTCCT     | 20 | 0 | 1 | ENST00000370796//<br>Ensembl//HPRT1  |
| D3 | ENST000<br>00373316 | 102<br>083 | GGAGAACCTCCG<br>CTTTCAT      | 19 | GCTGGCTCGGCTT<br>TAACC       | 18 | 0 | 1 | ENST00000373316//<br>Ensembl//PGK1   |
| E3 | ENST000<br>00228306 | 101<br>144 | TCGACAATGGCA<br>GCATCTAC     | 20 | GCCAATCTGCAGA<br>CAGACAC     | 20 | 0 | 1 | ENST00000228306//<br>Ensembl//RPLP0  |
| F3 | ENST000<br>00392396 | 102<br>095 | TTGAGAAAACAA<br>TGCAAAATGTG  | 23 | CCCAGTTGCTGTC<br>CTGATATAGA  | 23 | 0 | 1 | ENST00000392396//<br>Ensembl//TFRC   |
| G3 | ENST000<br>00322644 | 102<br>127 | GCAAAATCACCA<br>AGAGAGACG    | 21 | CACGTCGACAGGA<br>ACATCAG     | 20 | 1 | 0 | ENST00000322644//<br>Ensembl//POLR2A |
| H3 | ENST000<br>00360110 | 107<br>847 | TGGGTTTTTGTTA<br>CCTTTATGGTT | 24 | GGAGGTAACATGC<br>AAATAATGTGA | 24 | 1 | 0 | ENST00000360110//<br>Ensembl//TFRC   |
| A4 | NR_00328<br>6       | 104<br>092 | GACGGACCAGAG<br>CGAAAG       | 18 | CGTCTTCGAACCT<br>CCGACT      | 19 | 0 | 1 | NR_003286//EntrezG<br>ene//RN18S1    |
| B4 | ENST000<br>00349264 | 102<br>065 | CCGTGTGAACCAT<br>GTGACTTT    | 21 | CCTCCATGATGCT<br>GCTTACA     | 20 | 0 | 1 | ENST00000349264//<br>Ensembl//B2M    |
| C4 | ENST000<br>00229239 | 143<br>641 | TGGTATCGTGGA<br>AGGACTCA     | 20 | GCAGGGATGATGT<br>TCTGGAG     | 20 | 0 | 1 | ENST00000229239//<br>Ensembl//GAPDH  |
| D4 | ENST000<br>00256079 | 102<br>132 | GTGTACACACTG<br>GCAGAGCAC    | 21 | GCCTCCCTGTTGTT<br>CAATCT     | 20 | 0 | 1 | ENST00000256079//<br>Ensembl//IPO8   |
| E4 | ENST000<br>00355968 | 102<br>088 | TTCATCTGCACTG<br>CCAAGAC     | 20 | CACTTTGCCAAAC<br>ACCACAT     | 20 | 0 | 1 | ENST00000355968//<br>Ensembl//PPIA   |

|    |                 |            |                              |    |                              |    |   |   |                                      |
|----|-----------------|------------|------------------------------|----|------------------------------|----|---|---|--------------------------------------|
| F4 | ENST00000264932 | 145<br>170 | TCCACTACATGAC<br>GGAGCAG     | 20 | CCATCTTCAGTTCT<br>GCTAAACG   | 22 | 0 | 1 | ENST00000264932//<br>Ensembl//SDHA   |
| G4 | ENST00000353245 | 102<br>125 | GATCCCCAATGCT<br>TCACAAG     | 20 | TGCTTGTTGTGAC<br>TGATCGAC    | 21 | 0 | 1 | ENST00000353245//<br>Ensembl//YWHAZ  |
| H4 | ENST00000322644 | 102<br>977 | TCCGTATTCGCAT<br>CATGAAC     | 20 | TCATCCATCTTGTC<br>CACCAC     | 20 | 1 | 0 | ENST00000322644//<br>Ensembl//POLR2A |
| A5 | ENST00000331789 | 101<br>125 | GGCCAGGTCATC<br>ACCATT       | 18 | GGATGCCACAGGA<br>CTCCAT      | 19 | 0 | 1 | ENST00000331789//<br>Ensembl//ACTB   |
| B5 |                 | 102<br>141 | TGCAGGCTGCCTA<br>TCAGAA      | 19 | GCGAGCTTAGTGA<br>TACTTGTTGG  | 22 | 0 | 1 | ENST00000335295//<br>Ensembl//HBB    |
| C5 | ENST00000304895 | 102<br>074 | CGCCCTGCCTATC<br>TGTATTC     | 20 | TCCCCACAGGGAG<br>TGTGTAG     | 20 | 0 | 1 | ENST00000304895//<br>Ensembl//GUSB   |
| D5 | ENST00000278715 | 102<br>110 | TGCCCTGGAGAA<br>GAATGAAG     | 20 | CAGCATCATGAGG<br>GTTTTC      | 20 | 0 | 1 | ENST00000278715//<br>Ensembl//HMBS   |
| E5 | ENST00000391857 | 102<br>119 | CTGGACCGTCTCA<br>AGGTGTT     | 20 | GCCCCAGATAGGC<br>AAACTT      | 19 | 0 | 1 | ENST00000391857//<br>Ensembl//RPL13A |
| F5 | ENST00000392092 | 101<br>145 | GAACATCATGGA<br>TCAGAACAA    | 23 | ATAGGGATTCCGG<br>GAGTCAT     | 20 | 0 | 1 | ENST00000392092//<br>Ensembl//TBP    |
| G5 | ENST00000322644 | 102<br>978 | CCTGAGTCCGGAT<br>GAACGTG     | 19 | GCCTCCCTCAGTC<br>GTCTCT      | 19 | 1 | 0 | ENST00000322644//<br>Ensembl//POLR2A |
| H5 | ENST00000360110 | 102<br>422 | TGGGTTTTTGTTA<br>CCTTTATGGTT | 24 | GGAGGTAACATGC<br>AAATAATGTGA | 24 | 1 | 0 | ENST00000360110//<br>Ensembl//TFRC   |
| A6 | ENST00000394965 | 102<br>108 | GAAATGAATGCC<br>GTGAGGAA     | 20 | CCTCCATCGGTTTT<br>CACACT     | 20 | 0 | 1 | ENST00000394965//<br>Ensembl//ALAS1  |
| B6 | ENST00000393564 | 102<br>098 | TCCATCAGTCGGA<br>TACACACA    | 21 | CACCAGATGGTGG<br>GGTAGAT     | 20 | 0 | 1 | ENST00000393564//<br>Ensembl//G6PD   |
| C6 | ENST00000370796 | 102<br>079 | TGACCTTGATTTA<br>TTTTGCATACC | 24 | CGAGCAAGACGTT<br>CAGTCCT     | 20 | 0 | 1 | ENST00000370796//<br>Ensembl//HPRT1  |
| D6 | ENST00000373316 | 102<br>083 | GGAGAACCTCCG<br>CTTTCAT      | 19 | GCTGGCTCGGCTT<br>TAACC       | 18 | 0 | 1 | ENST00000373316//<br>Ensembl//PGK1   |
| E6 | ENST00000228306 | 101<br>144 | TCGACAATGGCA<br>GCATCTAC     | 20 | GCCAATCTGCAGA<br>CAGACAC     | 20 | 0 | 1 | ENST00000228306//<br>Ensembl//RPLP0  |
| F6 | ENST00000392396 | 102<br>095 | TTGAGAAAACAA<br>TGCAAAATGTG  | 23 | CCCAGTTGCTGTC<br>CTGATATAGA  | 23 | 0 | 1 | ENST00000392396//<br>Ensembl//TFRC   |
| G6 | ENST00000322644 | 102<br>127 | GCAAATTCACCA<br>AGAGAGACG    | 21 | CACGTCGACAGGA<br>ACATCAG     | 20 | 1 | 0 | ENST00000322644//<br>Ensembl//POLR2A |
| H6 | ENST00000360110 | 107<br>847 | TGGGTTTTTGTTA<br>CCTTTATGGTT | 24 | GGAGGTAACATGC<br>AAATAATGTGA | 24 | 1 | 0 | ENST00000360110//<br>Ensembl//TFRC   |
| A7 | NR_003286       | 104<br>092 | GACGGACCAGAG<br>CGAAAG       | 18 | CGTCTTCGAACCT<br>CCGACT      | 19 | 0 | 1 | NR_003286//EntrezGene//RN18S1        |

|    |                 |        |                          |    |                         |    |   |   |                                  |
|----|-----------------|--------|--------------------------|----|-------------------------|----|---|---|----------------------------------|
| B7 | ENST00000349264 | 102065 | CCGTGTGAACCATGTGACTTT    | 21 | CCTCCATGATGCTGCTTACA    | 20 | 0 | 1 | ENST00000349264//Ensembl//B2M    |
| C7 | ENST00000229239 | 143641 | TGGTATCGTGGAAGGACTCA     | 20 | GCAGGGATGATGTCTGGAG     | 20 | 0 | 1 | ENST00000229239//Ensembl//GAPDH  |
| D7 | ENST00000256079 | 102132 | GTGTACACACTGGCAGAGCAC    | 21 | GCCTCCCTGTTGTTCAATCT    | 20 | 0 | 1 | ENST00000256079//Ensembl//IPO8   |
| E7 | ENST00000355968 | 102088 | TTCATCTGCACTGCCAAGAC     | 20 | CACTTTGCCAAACACCACAT    | 20 | 0 | 1 | ENST00000355968//Ensembl//PPIA   |
| F7 | ENST00000264932 | 145170 | TCCACTACATGACGGAGCAG     | 20 | CCATCTTCAGTTCTGCTAAACG  | 22 | 0 | 1 | ENST00000264932//Ensembl//SDHA   |
| G7 | ENST00000353245 | 102125 | GATCCCCAATGCTTCACAAAG    | 20 | TGCTTGTTGTGACTGATCGAC   | 21 | 0 | 1 | ENST00000353245//Ensembl//YWHAZ  |
| H7 | ENST00000322644 | 102977 | TCCGTATTCGCATCATGAAC     | 20 | TCATCCATCTTGTCACCAC     | 20 | 1 | 0 | ENST00000322644//Ensembl//POLR2A |
| A8 | ENST00000331789 | 101125 | GGCCAGGTCATCACCATT       | 18 | GGATGCCACAGGACTCCAT     | 19 | 0 | 1 | ENST00000331789//Ensembl//ACTB   |
| B8 |                 | 102141 | TGCAGGCTGCCTATCAGAA      | 19 | GCGAGCTTAGTGATACTTGTTGG | 22 | 0 | 1 | ENST00000335295//Ensembl//HBB    |
| C8 | ENST00000304895 | 102074 | CGCCCTGCCTATCTGTATTC     | 20 | TCCCCACAGGGAGTGTGTAG    | 20 | 0 | 1 | ENST00000304895//Ensembl//GUSB   |
| D8 | ENST00000278715 | 102110 | TGCCCTGGAGAAGAATGAAG     | 20 | CAGCATCATGAGGGTTTTC     | 20 | 0 | 1 | ENST00000278715//Ensembl//HMBS   |
| E8 | ENST00000391857 | 102119 | CTGGACCGTCTCAAGGTGTT     | 20 | GCCCCAGATAGGCAAACTT     | 19 | 0 | 1 | ENST00000391857//Ensembl//RPL13A |
| F8 | ENST00000392092 | 101145 | GAACATCATGGA TCAGAACAACA | 23 | ATAGGGATTCCGGGAGTCAT    | 20 | 0 | 1 | ENST00000392092//Ensembl//TBP    |
| G8 | ENST00000322644 | 102978 | CCTGAGTCCGGATGAAC TG     | 19 | GCCTCCCTCAGTCGTCTCT     | 19 | 1 | 0 | ENST00000322644//Ensembl//POLR2A |
| H8 | ENST00000360110 | 102422 | TGGGTTTTTGTTACCTTATGGTT  | 24 | GGAGGTAACATGCAATAATGTGA | 24 | 1 | 0 | ENST00000360110//Ensembl//TFRC   |
| A9 | ENST00000394965 | 102108 | GAAATGAATGCCGTGAGGAA     | 20 | CCTCCATCGGTTTT CACACT   | 20 | 0 | 1 | ENST00000394965//Ensembl//ALAS1  |
| B9 | ENST00000393564 | 102098 | TCCATCAGTCGGATACACACA    | 21 | CACCAGATGGTGGGGTAGAT    | 20 | 0 | 1 | ENST00000393564//Ensembl//G6PD   |
| C9 | ENST00000370796 | 102079 | TGACCTGATTATTTTGCATACC   | 24 | CGAGCAAGACGTT CAGTCCT   | 20 | 0 | 1 | ENST00000370796//Ensembl//HPRT1  |
| D9 | ENST00000373316 | 102083 | GGAGAACCTCCGCTTTCAT      | 19 | GCTGGCTCGGCTTTAACC      | 18 | 0 | 1 | ENST00000373316//Ensembl//PGK1   |
| E9 | ENST00000228306 | 101144 | TCGACAATGGCAGCATCTAC     | 20 | GCCAATCTGCAGACAGACAC    | 20 | 0 | 1 | ENST00000228306//Ensembl//RPLP0  |

|     |                 |        |                              |    |                              |    |   |   |                                      |
|-----|-----------------|--------|------------------------------|----|------------------------------|----|---|---|--------------------------------------|
| F9  | ENST00000392396 | 102095 | TTGAGAAAACAA<br>TGCAAAATGTG  | 23 | CCCAGTTGCTGTC<br>CTGATATAGA  | 23 | 0 | 1 | ENST00000392396//<br>Ensembl//TFRC   |
| G9  | ENST00000322644 | 102127 | GCAAAATCACCA<br>AGAGAGACG    | 21 | CACGTCGACAGGA<br>ACATCAG     | 20 | 1 | 0 | ENST00000322644//<br>Ensembl//POLR2A |
| H9  | ENST00000360110 | 107847 | TGGGTTTTTGTTA<br>CCTTTATGGTT | 24 | GGAGGTAACATGC<br>AAATAATGTGA | 24 | 1 | 0 | ENST00000360110//<br>Ensembl//TFRC   |
| A10 | NR_003286       | 104092 | GACGGACCAGAG<br>CGAAAG       | 18 | CGTCTTCGAACCT<br>CCGACT      | 19 | 0 | 1 | NR_003286//EntrezG<br>ene//RN18S1    |
| B10 | ENST00000349264 | 102065 | CCGTGTGAACCAT<br>GTGACTTT    | 21 | CCTCCATGATGCT<br>GCTTACA     | 20 | 0 | 1 | ENST00000349264//<br>Ensembl//B2M    |
| C10 | ENST00000229239 | 143641 | TGGTATCGTGGA<br>AGGACTCA     | 20 | GCAGGGATGATGT<br>TCTGGAG     | 20 | 0 | 1 | ENST00000229239//<br>Ensembl//GAPDH  |
| D10 | ENST00000256079 | 102132 | GTGTACACACTG<br>GCAGAGCAC    | 21 | GCCTCCCTGTTGTT<br>CAATCT     | 20 | 0 | 1 | ENST00000256079//<br>Ensembl//IPO8   |
| E10 | ENST00000355968 | 102088 | TTCATCTGCACTG<br>CCAAGAC     | 20 | CACTTTGCCAAAC<br>ACCACAT     | 20 | 0 | 1 | ENST00000355968//<br>Ensembl//PPIA   |
| F10 | ENST00000264932 | 145170 | TCCACTACATGAC<br>GGAGCAG     | 20 | CCATCTCAGTTCT<br>GCTAAACG    | 22 | 0 | 1 | ENST00000264932//<br>Ensembl//SDHA   |
| G10 | ENST00000353245 | 102125 | GATCCCAATGCT<br>TCACAAG      | 20 | TGCTTGTGTGAC<br>TGATCGAC     | 21 | 0 | 1 | ENST00000353245//<br>Ensembl//YWHAZ  |
| H10 | ENST00000322644 | 102977 | TCCGTATTCGCAT<br>CATGAAC     | 20 | TCATCCATCTTGTC<br>CACCAC     | 20 | 1 | 0 | ENST00000322644//<br>Ensembl//POLR2A |
| A11 | ENST00000331789 | 101125 | GGCCAGGTCATC<br>ACCATT       | 18 | GGATGCCACAGGA<br>CTCCAT      | 19 | 0 | 1 | ENST00000331789//<br>Ensembl//ACTB   |
| B11 |                 | 102141 | TGCAGGCTGCCTA<br>TCAGAA      | 19 | GCGAGCTTAGTGA<br>TACTTGTGG   | 22 | 0 | 1 | ENST00000335295//<br>Ensembl//HBB    |
| C11 | ENST00000304895 | 102074 | CGCCCTGCCTATC<br>TGTATTC     | 20 | TCCCCACAGGGAG<br>TGTGTAG     | 20 | 0 | 1 | ENST00000304895//<br>Ensembl//GUSB   |
| D11 | ENST00000278715 | 102110 | TGCCCTGGAGAA<br>GAATGAAG     | 20 | CAGCATCATGAGG<br>GTTTTC      | 20 | 0 | 1 | ENST00000278715//<br>Ensembl//HMBS   |
| E11 | ENST00000391857 | 102119 | CTGGACCGTCTCA<br>AGGTGTT     | 20 | GCCCCAGATAGGC<br>AAACTT      | 19 | 0 | 1 | ENST00000391857//<br>Ensembl//RPL13A |
| F11 | ENST00000392092 | 101145 | GAACATCATGGA<br>TCAGAACAACA  | 23 | ATAGGGATTCCGG<br>GAGTCAT     | 20 | 0 | 1 | ENST00000392092//<br>Ensembl//TBP    |
| G11 | ENST00000322644 | 102978 | CCTGAGTCCGGAT<br>GAACTG      | 19 | GCCTCCCTCAGTC<br>GTCTCT      | 19 | 1 | 0 | ENST00000322644//<br>Ensembl//POLR2A |
| H11 | ENST00000360110 | 102422 | TGGGTTTTTGTTA<br>CCTTTATGGTT | 24 | GGAGGTAACATGC<br>AAATAATGTGA | 24 | 1 | 0 | ENST00000360110//<br>Ensembl//TFRC   |
| A12 | ENST00000394965 | 102108 | GAAATGAATGCC<br>GTGAGGAA     | 20 | CCTCCATCGGTTTT<br>CACACT     | 20 | 0 | 1 | ENST00000394965//<br>Ensembl//ALAS1  |

|     |                 |        |                              |    |                              |    |   |   |                                      |
|-----|-----------------|--------|------------------------------|----|------------------------------|----|---|---|--------------------------------------|
| B12 | ENST00000393564 | 102098 | TCCATCAGTCGGA<br>TACACACA    | 21 | CACCAGATGGTGG<br>GGTAGAT     | 20 | 0 | 1 | ENST00000393564//<br>Ensembl//G6PD   |
| C12 | ENST00000370796 | 102079 | TGACCTTGATTTA<br>TTTTGCATACC | 24 | CGAGCAAGACGTT<br>CAGTCCT     | 20 | 0 | 1 | ENST00000370796//<br>Ensembl//HPRT1  |
| D12 | ENST00000373316 | 102083 | GGAGAACCTCCG<br>CTTTCAT      | 19 | GCTGGCTCGGCTT<br>TAACC       | 18 | 0 | 1 | ENST00000373316//<br>Ensembl//PGK1   |
| E12 | ENST00000228306 | 101144 | TCGACAATGGCA<br>GCATCTAC     | 20 | GCCAATCTGCAGA<br>CAGACAC     | 20 | 0 | 1 | ENST00000228306//<br>Ensembl//RPLP0  |
| F12 | ENST00000392396 | 102095 | TTGAGAAAACAA<br>TGCAAAATGTG  | 23 | CCCAGTTGCTGTC<br>CTGATATAGA  | 23 | 0 | 1 | ENST00000392396//<br>Ensembl//TFRC   |
| G12 | ENST00000322644 | 102127 | GCAAATTCACCA<br>AGAGAGACG    | 21 | CACGTCGACAGGA<br>ACATCAG     | 20 | 1 | 0 | ENST00000322644//<br>Ensembl//POLR2A |
| H12 | ENST00000360110 | 107847 | TGGGTTTGTGTTA<br>CCTTTATGGTT | 24 | GGAGGTAACATGC<br>AAATAATGTGA | 24 | 1 | 0 | ENST00000360110//<br>Ensembl//TFRC   |

**Supplementary Table S3. *In vitro* IC<sub>50</sub> concentrations for CX-5461 and CPT**

| Compound | *Pol I IC <sub>50</sub> , M | ±SD, M                |
|----------|-----------------------------|-----------------------|
| CX-5461  | 1.21x10 <sup>-7</sup>       | 0.22x10 <sup>-7</sup> |
| CPT      | 1.10x10 <sup>-6</sup>       | 0.08x10 <sup>-6</sup> |

\* IC<sub>50</sub> concentrations were determined in vitro, in reactions supplemented with 1 µl of HeLa nuclear extract and 100 ng of plasmid DNA containing rRNA promoter. rRNA transcripts were detected by S1 nuclease protection assay in triplicates as described in Methods. IC<sub>50</sub> and standard deviation was calculated using GraphPad Prism (version 9.11) software.

#### Supplementary Data 1. Sequence of pcfTAF110.

ctgtacaaagtgggtgatctagaggcccggttcgaaggtaagcctatccctaaccctctcctcggtctcgattctacgcgtacc  
gggttagtaatgagttaaacgggggaggctaactgaaacacggaaggagacaataccggaaggaaacccgcgctatgacggc  
aataaaaagacagaataaaacgcacgggtgttgggtcgtttgttcataaacgcggggttcggtcccagggtggaactctgtcg  
atacccaccgagacccattggggccaatacggcggttctctctttcccccaccccaagtcgggtgaaggccc  
agggctcgagccaacgtcgggcgaggccctgcatagcagatctgcgcagctggggctctagggggtatccacgcg  
ccctgtagcggcgcatlaagcgcggggtgtggtgttacgcgcagcgtgaccgtacacttgccagcgccctagcgccgct  
ccttcgcttctctccttctctcgccaggtcgccggttcccgctcaagctctaaatcgggcatcccttaggggtccgatttagt  
gctttacggcacctcgaccccaaaaacttgattaggggtgatggttcacgtatggggccatcgccctgatagacgggttttcgccc  
tgacgttgagtcacggttcttaatagtgactctgttccaaactggaacaacactcaaccctatctcggtctattctttgattataa  
gggattttggggatttcggcctattggttaaaaaatgagctgatttaacaaaaattaacggaattaattctgtggaatgtgtcagt  
taggggttggaagtccccagggtccccagcaggcagaagatgcaaagcatgcatctcaattagtcagcaaccagggtgtgga  
aagtcacccagggtccccagcaggcagaagatgcaaagcatgcatctcaattagtcagcaaccatagtcggcccccctaactcc  
gccatccccggccctaactccgcccagttccgcccattctccgcccattggtgactaattttttattatgcagaggccgaggcc  
gcctctgcctctgagctattccagaagtagtgaggaggctttttggaggcctaggctttgcaaaaagctccgggagctgtatat  
ccattttcggtatctgatcaagagacaggatgaggatcgttcgatgattgaacaagatggattgcacgcaggttctccggccgctt  
gggttgagaggctattcggtatgactgggcacaacagacaatcggtgctctgatgcccgtgtccggctgtcagcgcagg  
ggcgcccggttctttgtcaagaccgacctgtccggtgccctgaatgaactgcaggacgaggcagcgcggtatctggtggtg  
cacgacggggttcttgcgcagctgtgctcgacgtgtcactgaagcgggaagggactgggtgctattggggaagtgcggg  
gcaggatctctgtcatctcacctgtcctgccgagaaagtatccatcatggctgatgaatgcggcggtgcatacgttgatcc  
ggctacctgcccattcgaccaccaagcgaacatcgcatcgagcgagcacgtactcggtggaagccgggtctgtcgatcagg



atgatctggacgaagagcatcaggggctcgccagccgaactgttcgccaggctcaaggcgcgcatgcccacggcgagg  
atctcgtcgtgacccatggcgtatgcctgcttgcgaatatcatggtgaaaaatggccgctttctggattcatcgactgtggccggct  
gggtgtggcggaccgctatcaggacatagcgttggctacccgtgatattgctgaagagcttggcggcgaatgggctgaccgcttc  
ctcgtgctttacggtatcgccgctcccgattcgagcgcatcgcccttctatcgcccttctgacgagttctctgagcgggactctgggg  
tcgcgaaatgaccgaccaagcgacgcccacctgccatcacgagatttcgattccaccgccccttctatgaaaggttgggcttc  
ggaatcgtttccgggacgcccgttgatgatccctccagcgcggggatctcatgctggagttctcgccaccccaactgtttattg  
cagcttataatggttacaataaagcaatagcatcacaatttcacaaataaagcattttttactgcattctagtgtggtttgtcca  
aactcatcaatgtatcttatcatgtctgtataccgtcgacctctagctagagcttggcgtaatacatggtcatagctgttctctgtgtgaaa  
ttgttatccgctcacaattccacacaacatacgagccgggaagcataaagtgtaaagcctggggtgcctaatagtagttagtaactc  
acattaattgcgttgcgtcactgcccgtttccagtcgggaaacctgtcgtgccagctgcattaatgaatcggccaacgcgcggg  
gagaggcggttgcgtattggcgctcttccgcttctcgtcactgactcgctcgctcggtcgttcggctgcggcgagcgggtatca  
gctcactcaaaggcggtaatacggttatccacagaatcaggggataacgcaggaaagaacatgtgagcaaaaggccagca  
aaaggccaggaaccgtaaaaaggccgctgtcgtggcgttttccataggtccgccccctgacgagcatcacaaaaatcgac  
gctcaagtcagaggtggcgaaacccgacaggactataaagataaccaggcgtttccccctggaagctccctcgtgcgtctcctgt  
tccgacctgcccgttaccggatacctgtccgcttctcccttcgggaagcgtggcgcttctcaatgctcacgctgtaggtatctca  
gttcgggtgtaggtcgttcgctccaagctgggctgtgtgcacgaacccccgttcagccccgaccgctgcgccttatccggtaactatc  
gtcttgagccaacccggtaagacacgacttatcgccactggcagcagccactggtaacaggattagcagagcgaggtatgta  
ggcgggtgtacagagttctgaagtgtggcctaactacggctacactagaaggacagtatttggtatctgcgctcgtctgaagcc  
agttaccttcggaaaaaagagttggtagctcttgatccggcaacaaaccaccgctggtagcgggtgtttttgttgcgaagcagca  
gattacgcgcagaaaaaaaggatctcaagaagatcctttgatctttctacgggtctgacgctcagtggaacgaaaactcacgtt  
aagggtatttggcatgagattatcaaaaaggatcttcactagatccttttaataaaaaatgaagttttaaataatctaaagtatat  
atgagtaaacttggctgcaggtaccaatgcttaacagtgaggcacctatctcagcgatctgtctatttcgttcatccatagttgcct  
gactccccgtcgtgtagataactacgatacgggagggcttaccatctggtccccagtgctgcaatgataccgcgagacccacgct  
caccgggtccagattatcagcaataaaccagccagccggaagggccgagcgcagaagtggctcctgaactttatccgcctcc  
atccagctctattaattgttgcgggaagctagagtaagtagttcgccagttaatagtttgcgaacgttgttgcattgctacaggcat  
cgtggtgtcacgctcgtcgtttggtatggcttattcagctccggttccaacgatcaaggcgagttacatgatcccccattgtgtgca  
aaaaagcgggttagctccttcggtcctccgatcgttgcagaagtaagttggccgcagtggtatcactcatggttatggcagcactgc  
ataattctctactgtcatgccatccgtaagatgctttctgtgactggtgagtactcaaccaagtcattctgagaatagtgtatgcggc  
gaccgagttgctcttcccggcgtcaatacgggataataccgcgccacatagcagaactttaaaagtgtcatcattggaacac  
gttcttcggggcgaaaaactctcaaggatcttaccgctgttgagatccagttcgatgtaacccactcgtgcacccaactgatcttcag  
catcttttactttcaccagcgtttctgggtgagcaaaaacaggaaggcaaaatgccgcaaaaaagggaataagggcgacacg  
gaaatgttgaatactatacttctcttttcaatattattgaagcatttatcaggggtattgtctcatgagcggatacatattgaatgtatt  
agaaaaataaacaataaggggtccgcgcacatttccccgaaaagtgccacctgacgtcgacggatcgggagatctcccgatc  
ccctatggtcgactctcagtacaatctgctctgatgccgcatagtaagccagtatctgctccctgctgtgtgttggaggctcgtgagt  
agtgcgcgagcaaaatttaagctacaacaaggcaaggcttgaccgacaattgcatgaagaatctgcttaggggttaggcgttttgc  
gctgcttcgcatgtacgggacagataacgcgttgacattgattattgactagttattaatagtaataacacgggggtcattagtca  
tagcccatatatggagttccggttacataacttacggtaaatggcccgcctggctgaccgcccacgacccccgccattgacg  
tcaataatgacgtatgttccatagtaacgccaatagggactttccattgacgtcaatgggtggactattacggtaaactgccact  
tggcagtagcatcaagtgtatcatatgccagtagccccctattgacgtcaatgacggtaaatggcccgcctggcattatgccag  
tacctgaccttatgggactttcctacttggcagtagatctacgtatttagtcatcgctattaccatgggtgatgcggtttggcagtagatca  
atgggcgtggatagcggtttgactcacggggatttccaagtcaccacccattgacgtcaatgggagtttggtttggcaccaaaatc  
aacgggactttccaaaatgtcgtgaacaactccgccccattgacgcaaatggcggttaggcgtgtacgggtgggaggtctataaa  
gcagagctctctggctaactagagaacccactgcttactggcttatcgaaattaatacgaactcactataggagacccaagctgg  
ctagttaagctatcaacaagttgtacaaaaaagcaggctccgcgccgcccccttaccatggattacaaggatgacgacgat  
aaggacttcccagctccctccgcccctgcgttgtttctgaccggcccccttggtctgagcgacgtccctgacctcttctcatgtgcag  
ctggcgagacgcactgactctgcagaggcccagccccagaactcagagaatggggcactgcatgtgaccaaggacctgct  
gtgggagccggcaacccctgggcctctccccatgctgcctccccctcatcgatccctgggaccctggcctgactgcccgggacctg  
ctttccgcgagggtaccggtatcggaagcggccccgagtcgtgctggatgtgactgagcagatcagccggttccctcttgatca

tgagacgtagccttgcgccccggggaagctgatgctggagaattcaagctggagggagcggggagccgcactaagaag  
aagacagtggtcagtgtaagaagctgctccaggacctcggtagacaccagccctgggggtgtccctgggcttacctcagcaa  
ccgacagcgccgcttctatcctcgggggcccatcctgggcacgtcggtaggcagccacttggcagagctgtgcacgagg  
agctggtgctgcggtagggagcagctgcttctggatgaggcctgcactgggggcgcgctggcctgggttcttgaaggacacccc  
agttcgggcagctggtctaccctgctggaggcgccaggacaggctgcattccaagaggtcgttctgaccccagggtgacaatc  
cccaattccttgggaaacctggacgcatccagctccaggggacctgctcgggaagtggtagatgcaccgtccaggggagaaagt  
aaggccctatatacacttctccctcactggctgacctgtacctgacccctggcccttccatccctcctcagctctgtgcccgtc  
cgctctgactaccactgtgcggttggaagtttggttaaacagtggcagccaaccttctgcaggcgatgcaggtggagaaagg  
gccacggggatcagcctcagccctcacctgcccggggagctggccatctgcagccgctcgggagccgtctgccttggagccc  
tgaggatgggtgcggcaaactacagggacctgagacctcgtgttcgggactcctctcgtggcggtgggcagacttactg  
cgcacctcgggtgctgacctgggtgaccgcaccggagtgaagatgctggacactcagggcccgccgggctgtggtctgttg  
cttttctgttggggcagaggctcgtgccagaaaggggaacgtgtcctgcttaccagctacctggggcactccagcccaaatg  
cctccccctactcttcatctcgtctgacctcagttctctctacctagtgagcagcgcttccccgttgcgcatgtgaagtga  
accatggcctccccctcccgctcctgctggcccgactgtgcctccgccccggccagctgcgtgcagccccgtcctcggagg  
ccagggtgggcagctgcagctgctgcacctggcaggagaagggcgctcgggtccccgcctggcaggccccccccagctctt  
ccttccaggatcgactccccctcctgcatttctcgtgtaggcctaagatccagtggcggtgcaggagcgctgaaagcaccga  
ccataggtctggctgcgctgctcccgcccttgcctcagcgccacaccaggcctggtgctcttccagctctcggcggggaga  
tgtcttctaccagcagctccgccccagggtggactccagcctccgcagagatgctgggctcctggcgacaccaaacctgactg  
ccatgccccacagcttctggacctccaggacactgcgggctgcagccagtggctgaaggccctgctaaaagtggccctgg  
ctcctcctgtgtggacagcaccaccttaccacccgcccagatgctgggcagcacagagctgcggagggaggaagaggaag  
ggcagcggtgggtgtgctccgaaggccatggcccgagggcagctcctgctgcagagagacctgggctccctccctgcggc  
agagccacccctgcacccgagtcaggcctagaggacaagctcagtgcgcctgggggaagcctgggcaggccgaggg  
gctgcctggtgggagaggcagcagggcaggacctcggagccccgggagacagaccaggcgcccaagcgccggacccag  
ctgtccagcagctttcgtcagtggtcctgtagcagaggacaccagctccccctcatagccctgagtggtccacctgtgta  
tgtctgccccctgccccccacgaccccgccctccaggagttgactccggatgcatgcgcccaggcgctcccatcagagcagc  
ggcagatgctccgtgactacatggccaagctaccacccagagggacacccaggtgtgccaccacacctccccactcca  
ggcctccagcgtccgggcccactcgtcccagcagcacacacccgctcctctagctctcagccccctccggaagaagcctcgaat  
gggcttctgaaaggtgggcgcgccgacccagctt

## Supplementary Data 2. Sequence of CMV\_Fr.

gaaaaataaacaatataggggttccgcgcacatttccccgaaaagtgccacctgacgtcgacggatcgggagatctccgatcc  
cctatggtcgactctcagtacaatctgctctgatccgcagatgtaagccagatctgctccctgctgtgttggaggctcgtgagta  
gtgcgcgagcaaaatttaagctacaacaaggcaaggcttaccgacaattgcatgaagaatctgcttagggtaggcgttttgcg  
ctgcttcgcatgtacggggccagatatacggttgacattgatttagctagttattaatagtaataacgaggggtcattagttcat  
agcccatatatggagtccgcttacataactacggttaaatggcccgctggctgaccgccaacgacccccgcccattgacgt  
caataatgacgtatgttcccatagtaacgccaatagggaactttccattgacgtcaatgggtggactatttacggttaaactgccactt  
ggcagtacatcaagtgtatcatatgccaaagtacgccccctattgacgtcaatgacggttaaatggcccgctggcattatgccagt  
acatgaccttatgggacttctacttggcagtacatctacgtattagtcacgctattaccatggtgatgcggtttggcagtacatca  
atgggcgtggatagcgggttgactcacggggaattccaagctccacccattgacgtcaatgggagtttgggttggcaccaaaatc  
aacgggacttccaaaatgtcgtgaacaactccgccccattgacgcaaatggcggttaggcgtgacggtagggaggtctataaa  
gcagagctctctggctaactagagaacccactgcttactggctatcgaaattaatacagactcactataggagacccaagctgg  
ctagttaagctatcaacaagttgtacaaaaaagcaggctccgcgccgcccccttaccatggattacaaggatgacgacgat  
aaggactccccagctccctccgcccctgcgtgtttctgaccggcccccttggtctgagcgacgtccctgacctcttctcatgtgag  
ctggcgagacgcactgactctgccagaggcccagccccagaactcagagaatggggcactgcatgtgaccaaggacctgct  
gtgggagccggcaacccctgggcctctccccatgctgcctccccctcatgatccctgggacccctggcctgactgcccgggacctg  
cttttccgaggagggtaccggtatcggaagcgcccccgagtcgtgctggatgtgactgagca
